# Supplementary material for: Influence of parent graphite particle size on the electrochemistry of thermally reduced graphene oxide
Source: Royal Society of Chemistry journal article supplement (doi:10.1039/c2cp41462g), 2012-01-01
Supplement: c2cp41462g.pdf [file c2cp41462g.pdf]

# Influence of Parent Graphite Particle Size on the Electrochemistry of Thermally Reduced Graphene Oxide

Sze Yin Chee<sup>a</sup>, Hwee Ling Poh<sup>a</sup>, Chun Kiang Chua<sup>a</sup>, Filip Šaněk<sup>b</sup>, Zdeněk Sofer<sup>b</sup>,  
Martin Pumera<sup>a\*</sup>

<sup>a</sup>School of Physical and Mathematical Science, Division of Chemistry and Biological Chemistry, Nanyang Technological University, 21 Nanyang Link, Singapore. Fax: +65 6791-1961;

E-mail: pumera@ntu.edu.sg

<sup>b</sup>Department of Inorganic Chemistry, Institute of Chemical Technology Prague, Technická 5, 166 28 Prague 6, Czech Republic

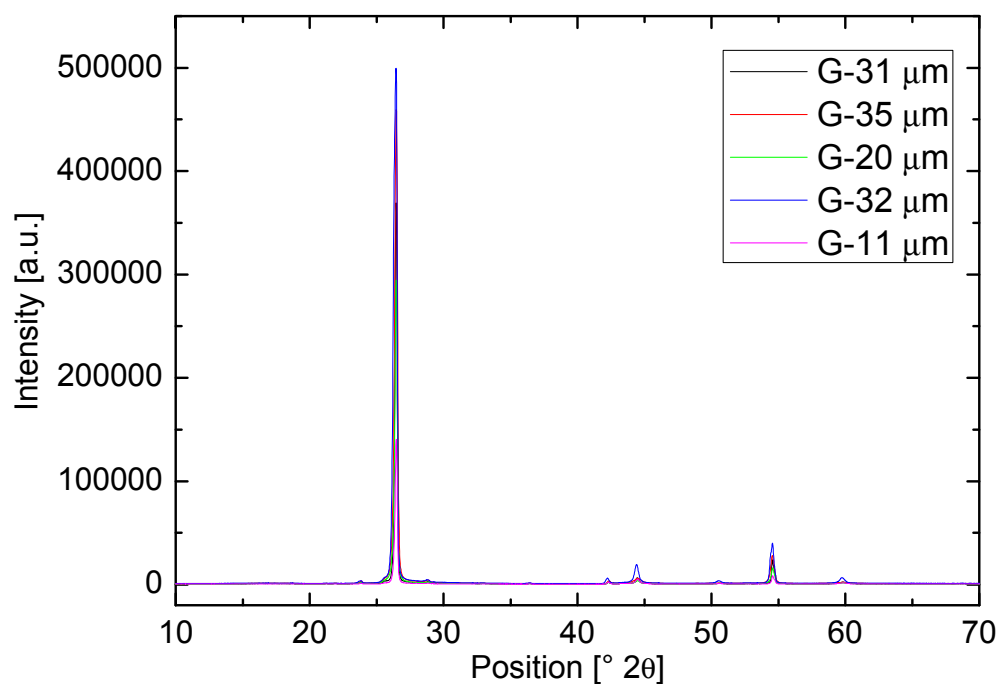

Figure S1. XRD of parent graphite materials.
